# Supplementary material
Source: publisher figshare collection journal article supplement (https://acs.figshare.com/ndownloader/files/14945336)
Supplement: Supplementary file 1 [file 14945336]

# Supporting Information for

## A Self-Healing and Highly Stretchable Polyelectrolyte Hydrogel via Cooperative Hydrogen-Bonding as Superabsorbent Polymer

Esra Su, Mine YURTSEVER, and Oguz Okay\*

Department of Chemistry, Istanbul Technical University, Maslak, 34469 Istanbul, Turkey

### Table of Contents

- Figure S1.** The weight swelling ratio  $m_{rel}$  and water content of PAMPS hydrogels as a function of AMPS content. S2
- Figure S2.** Frequency  $\omega$  dependences of the storage modulus  $G'$  (filled symbols), loss modulus  $G''$  (open symbols), and loss factor  $\tan \delta$  (lines) of T-50 and U-50 gels at 25 °C.  $\gamma_0 = 0.01$ . S2
- Figure S3. (a):** Tensile stress-strain curves of U- and T- hydrogels. AMPS contents as indicated. **(b):** Cyclic tensile tests conducted on U-gels up to a maximum strain  $\epsilon_{max}$  of 600% with 100% steps. Loading curves are indicated by arrows. AMPS = 50 (1), 55 (2), and 60 wt % (3). The inset shows the initial portion of the loading curves. S2
- Figure S4. (a):** Stress-strain curves of PAMPS hydrogels prepared in the presence of various amounts of BAAM cross-linker. AMPS = 50 wt %. **(b):** Young's modulus  $E$  of PAMPS hydrogels and the fraction  $f_{H-bonds}$  of cross-links contributed from the H-bonds as a function of BAAM content. AMPS = 50 wt.%. For hybrid cross-linked hydrogels containing both physical and chemical cross-links, one may calculate the fraction  $f_{H-bonds}$  of cross-links contributed from the H-bonds by comparing the moduli of hydrogels prepared with and without BAAM. Because the cross-link density at a given polymer concentration is directly proportional to the modulus  $E$ ,  $f_{H-bonds}$  was estimated using the equation  $f_{H-bonds} = E_0/E$  where  $E_0$  and  $E$  are Young's moduli of PAMPS hydrogels without and with BAAM, respectively. S3
- Figure S5.** The weight swelling  $m_{rel}$  and water contents of PAMPS hydrogels as a function of BAAM content. AMPS = 50 wt %. S3
- Figure S6.** The optimized geometries of AMPS in which C=O and N-H bonds are trans (a) and cis (b) to each other, and DMAA (c). S4
- Figure S7.** Optimized geometry of AMPS-DMAA dimer. D and A represent H-bond donor and acceptor sites on the molecule, respectively. S5
- Figure S8.** Optimized geometries of (AMPS)<sub>2</sub> - (AMPS)<sub>2</sub> (a) and AMPS/DMAA - AMPS/DMAA dimers (b) in -4 and -2 anionic states, respectively, in implicit water medium. S5, S6
- Figure S9.** Optimized geometries of (AMPS)<sub>2</sub> - (AMPS)<sub>2</sub> (a) and AMPS/DMAA - AMPS/DMAA dimers (b) in neutral state in explicit water medium in the presence of H<sub>3</sub>O<sup>+</sup>-H<sub>2</sub>O per SO<sub>3</sub><sup>-</sup> group. S7
- Figure S10.** Initial portion of the loading curves of successive cyclic tests conducted on U-50 (a) and U-75/0.6 hydrogels (b). S8
- Figure S11.** Self-recovery behavior of a rod-shaped U-75/0.6 gel specimen after stretching to 800 % elongation ratio. S8

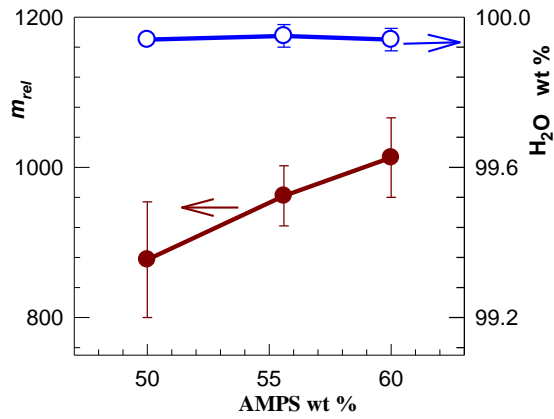

**Figure S1.** The weight swelling ratio  $m_{rel}$  and water content of PAMPS hydrogels as a function of AMPS content.

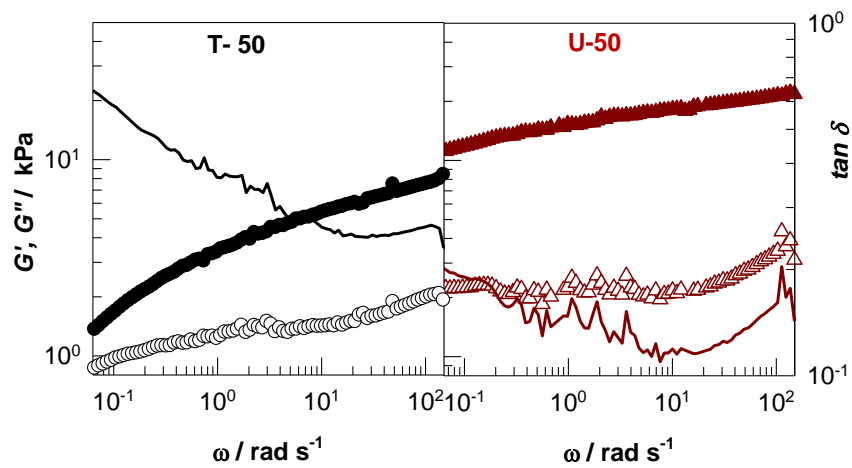

**Figure S2.** Frequency  $\omega$  dependences of the storage modulus  $G'$  (filled symbols), loss modulus  $G''$  (open symbols), and loss factor  $\tan \delta$  (lines) of T-50 and U-50 gels at 25 °C.  $\gamma_0 = 0.01$ .

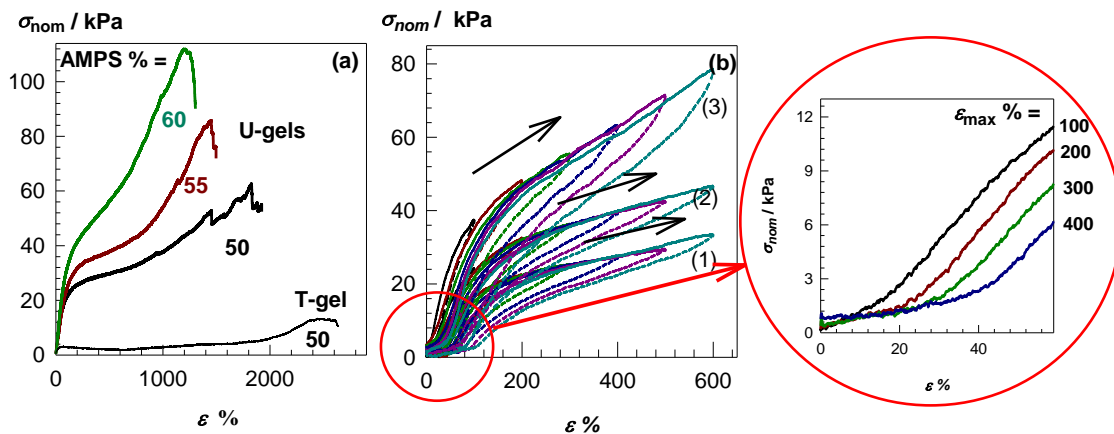

**Figure S3.** (a): Tensile stress-strain curves of U- and T- hydrogels. AMPS contents as indicated. (b): Cyclic tensile tests conducted on U-gels up to a maximum strain  $\epsilon_{max}$  of 600% with 100% steps.

Loading curves are indicated by arrows. AMPS = 50 (1), 55 (2), and 60 wt % (3). The inset shows the initial portion of the loading curves.

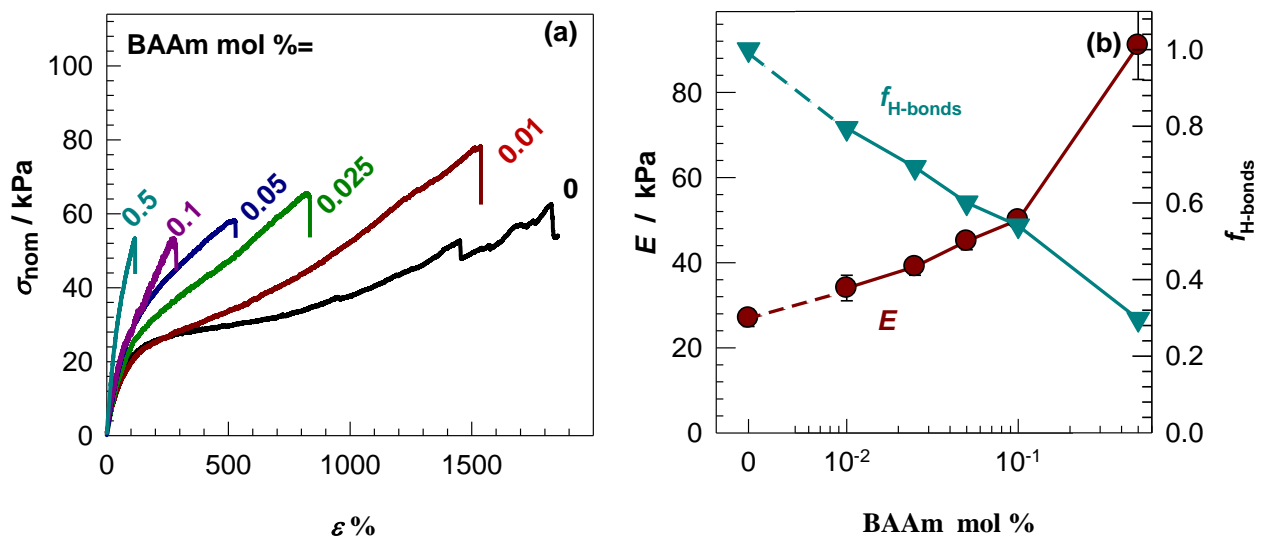

**Figure S4. (a):** Stress-strain curves of PAMPS hydrogels prepared in the presence of various amounts of BAAM cross-linker. AMPS = 50 wt %. **(b):** Young's modulus  $E$  of PAMPS hydrogels and the fraction  $f_{H-bonds}$  of cross-links contributed from the H-bonds as a function of BAAM content. AMPS = 50 wt.%. For hybrid cross-linked hydrogels containing both physical and chemical cross-links, one may calculate the fraction  $f_{H-bonds}$  of cross-links contributed from the H-bonds by comparing the moduli of hydrogels prepared with and without BAAM. Because the cross-link density at a given polymer concentration is directly proportional to the modulus  $E$ ,  $f_{H-bonds}$  was estimated using the equation  $f_{H-bonds} = E_0/E$  where  $E_0$  and  $E$  are Young's moduli of PAMPS hydrogels without and with BAAM, respectively.

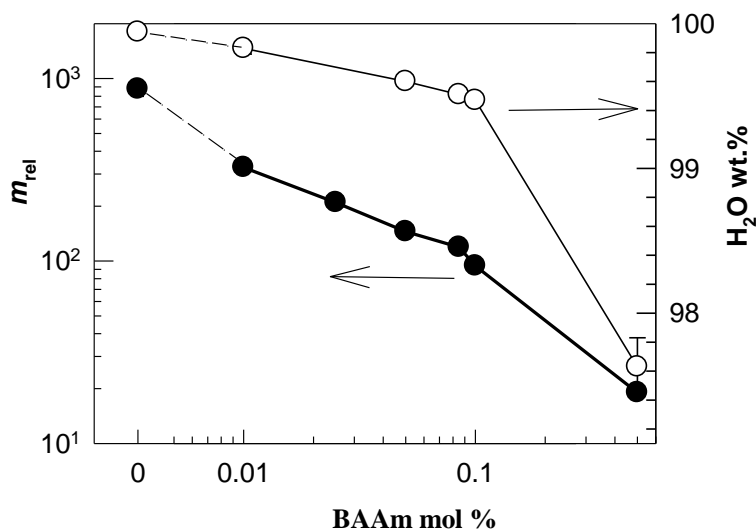

**Figure S5.** The weight swelling  $m_{rel}$  and water contents of PAMPS hydrogels as a function of BAAM content. AMPS = 50 wt %.

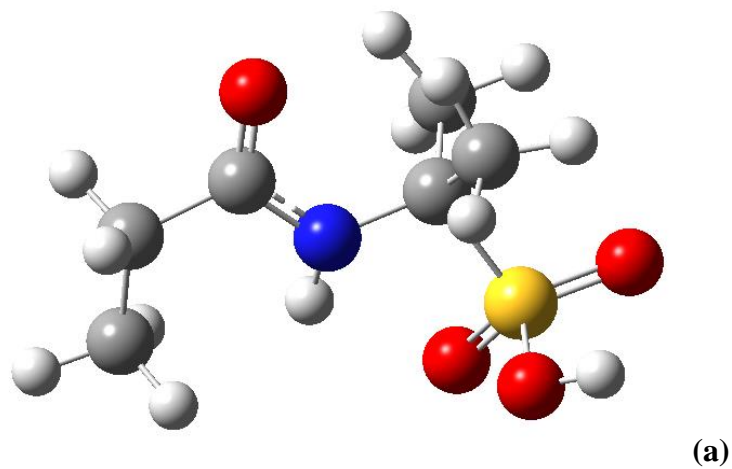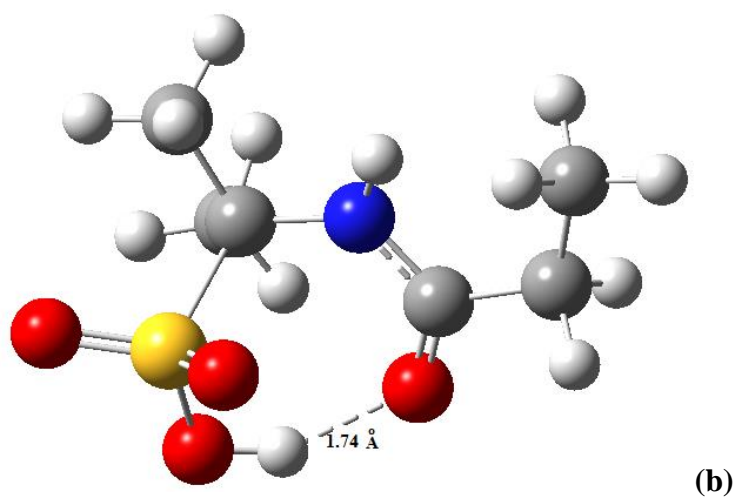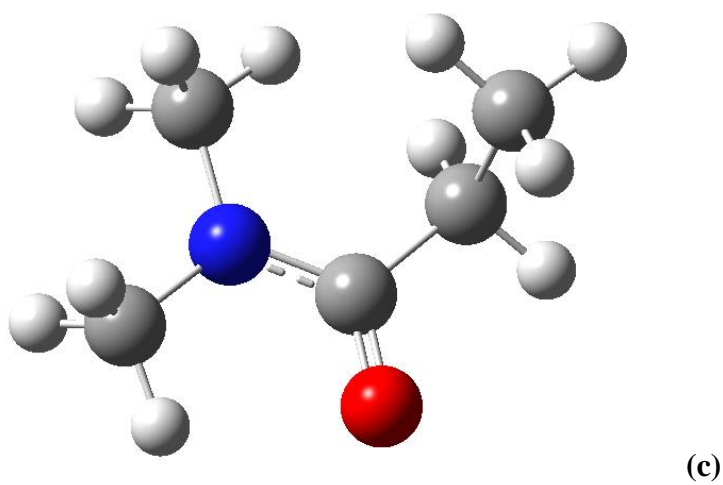

**Figure S6.** The optimized geometries of AMPS in which C=O and N-H bonds are trans (a) and cis (b) to each other, and DMAA (c).

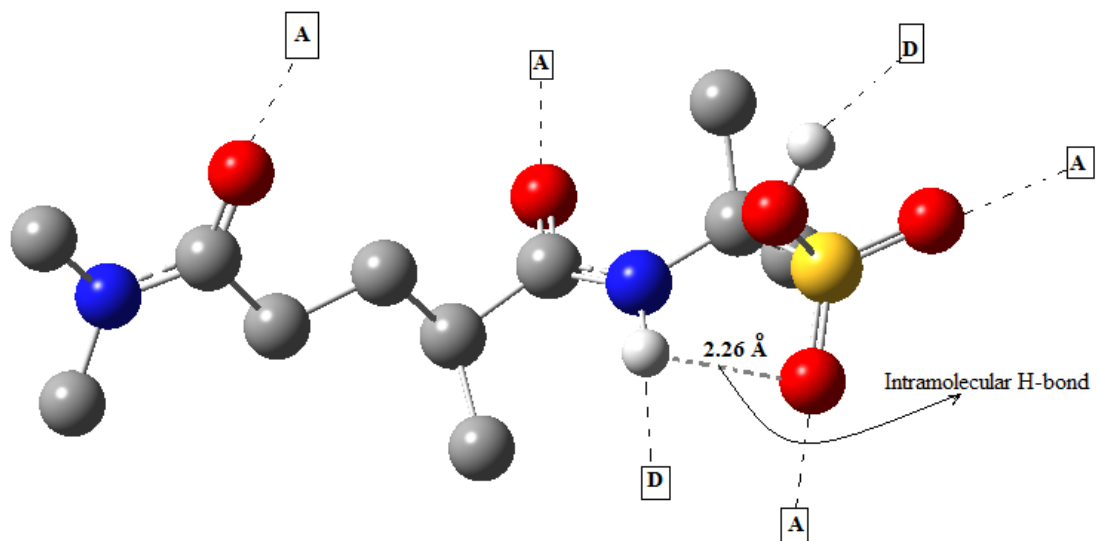

**Figure S7.** Optimized geometry of AMPS-DMAA dimer. D and A represent H-bond donor and acceptor sites on the molecule, respectively.

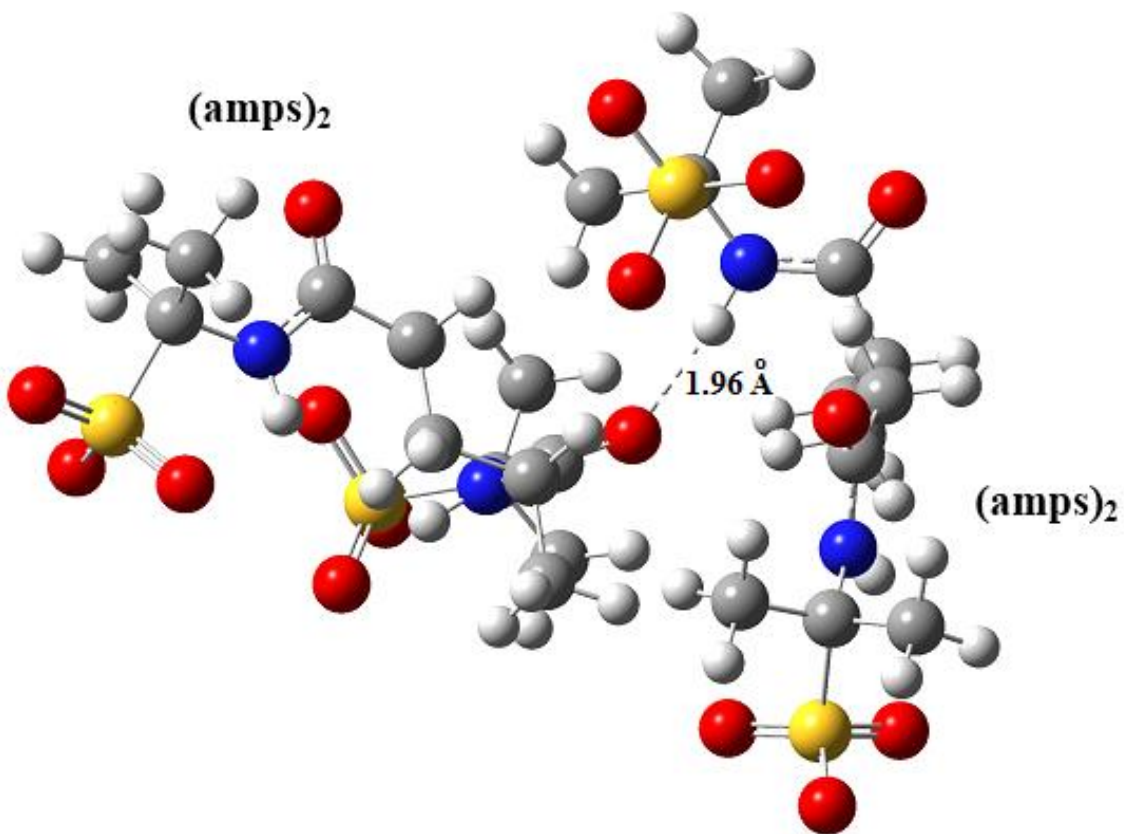

(a)

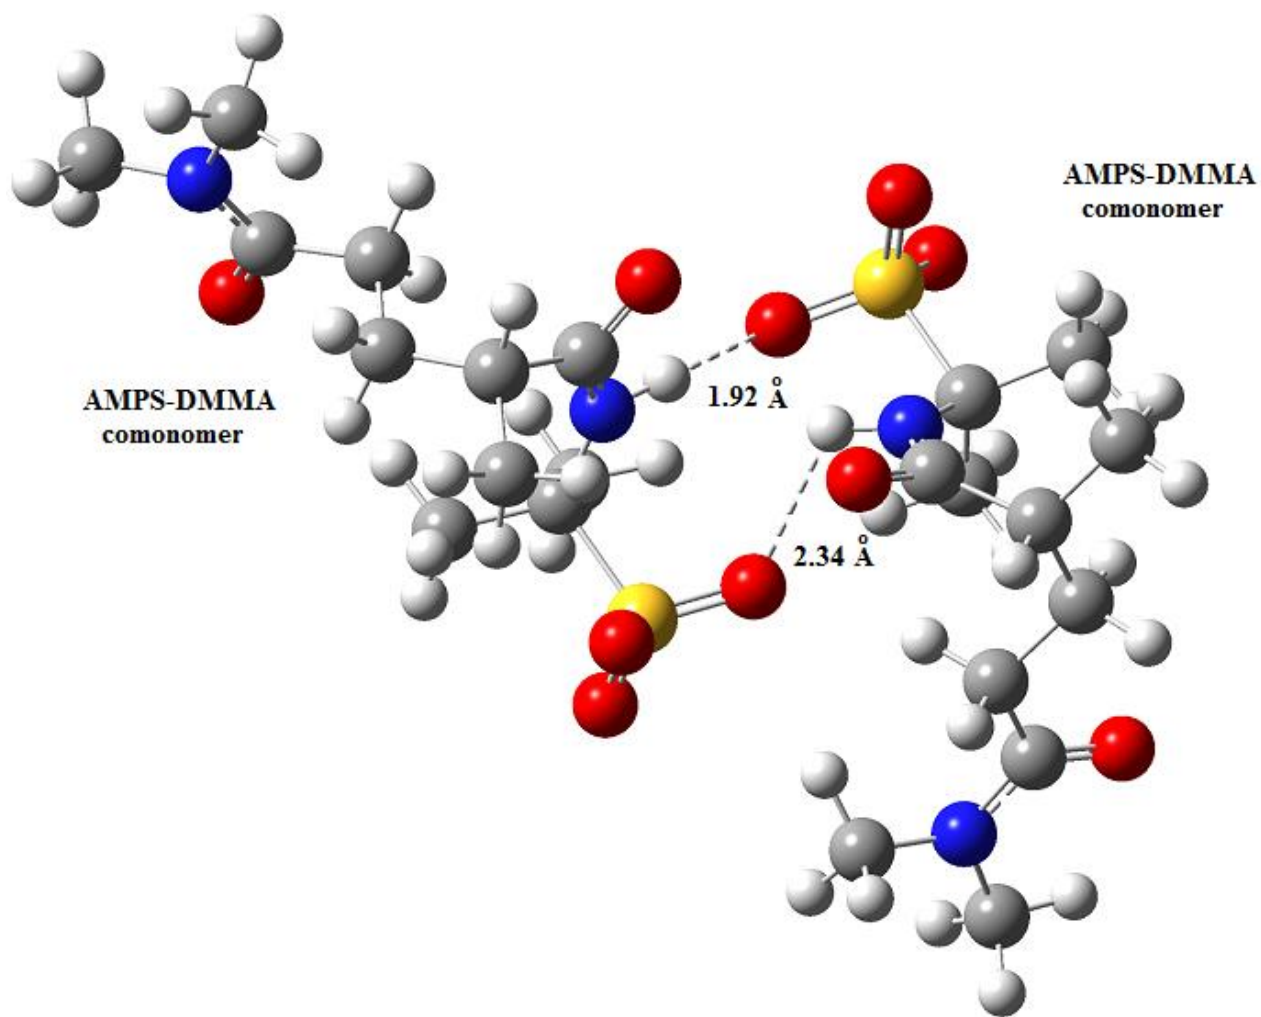

(b)

**Figure S8.** Optimized geometries of (AMPS)<sub>2</sub> - (AMPS)<sub>2</sub> (a) and AMPS/DMAA - AMPS/DMAA dimers (b) in -4 and -2 anionic states, respectively, in implicit water medium.

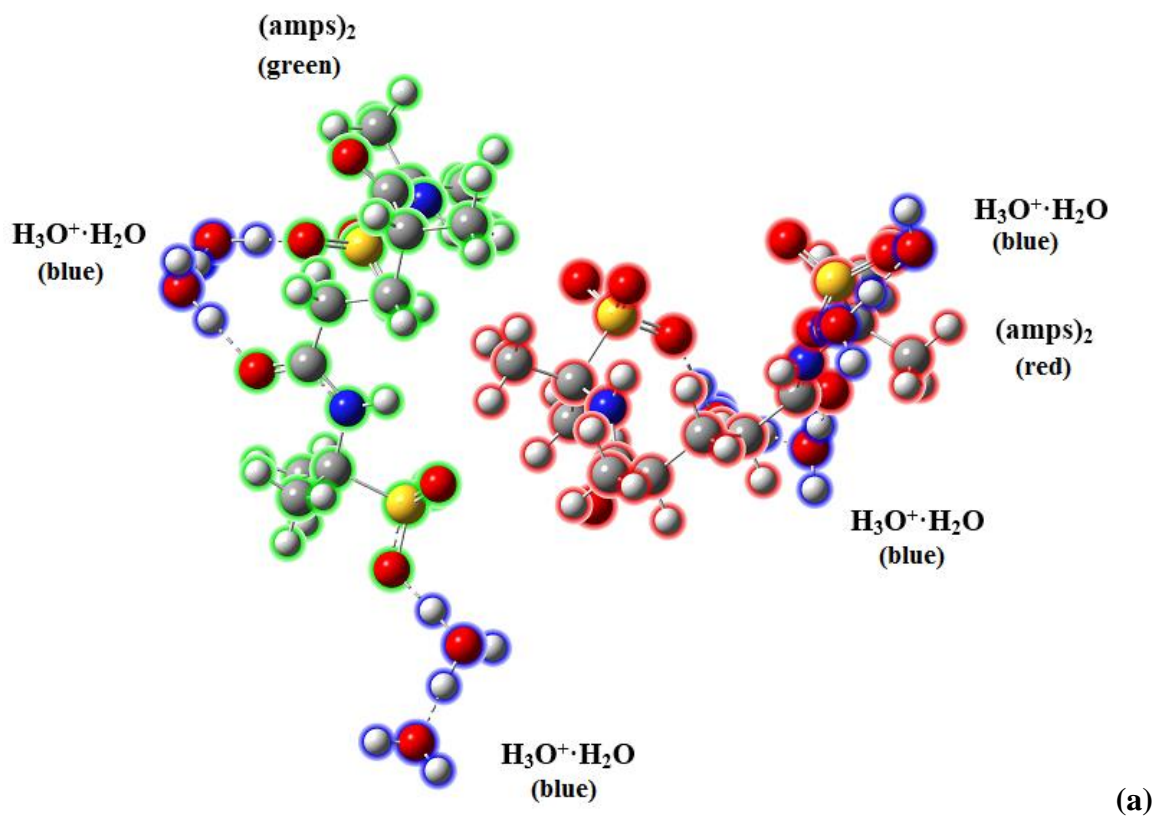

(a)

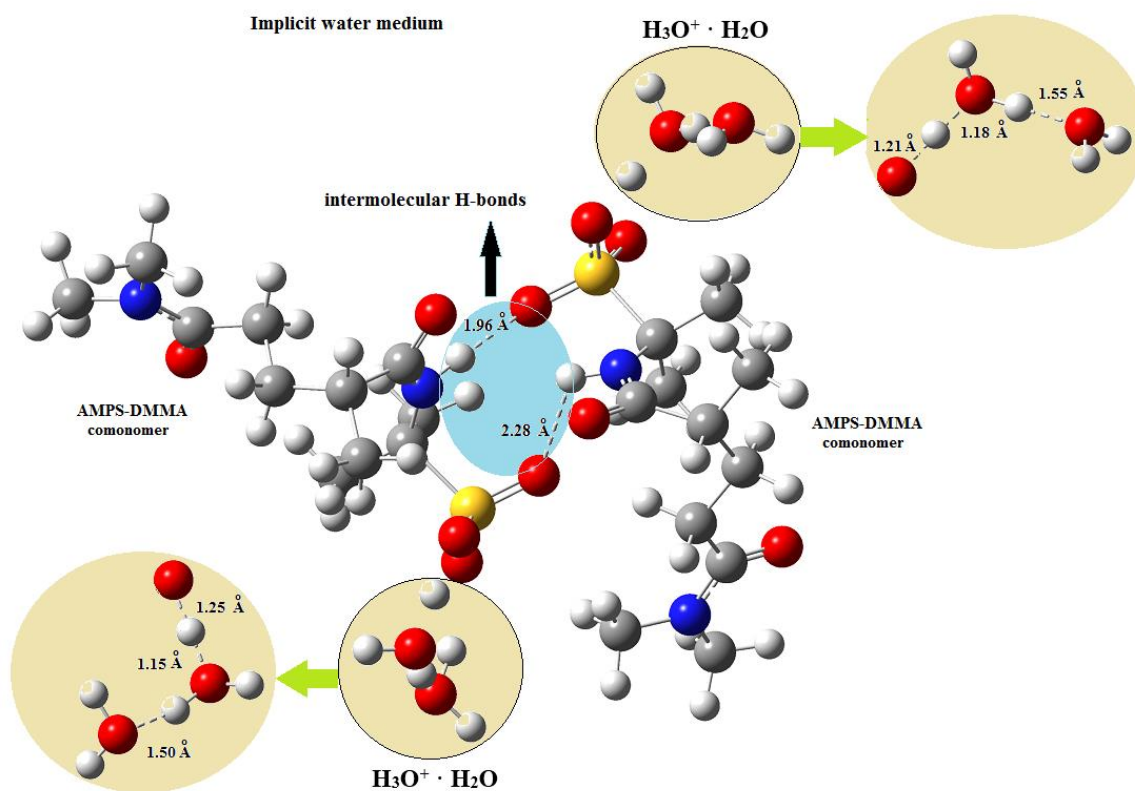

(b)

**Figure S9.** Optimized geometries of (AMPS)<sub>2</sub> - (AMPS)<sub>2</sub> (a) and AMPS/DMAA - AMPS/DMAA dimers (b) in neutral state in explicit water medium in the presence of H<sub>3</sub>O<sup>+</sup>·H<sub>2</sub>O per SO<sub>3</sub><sup>-</sup> group.

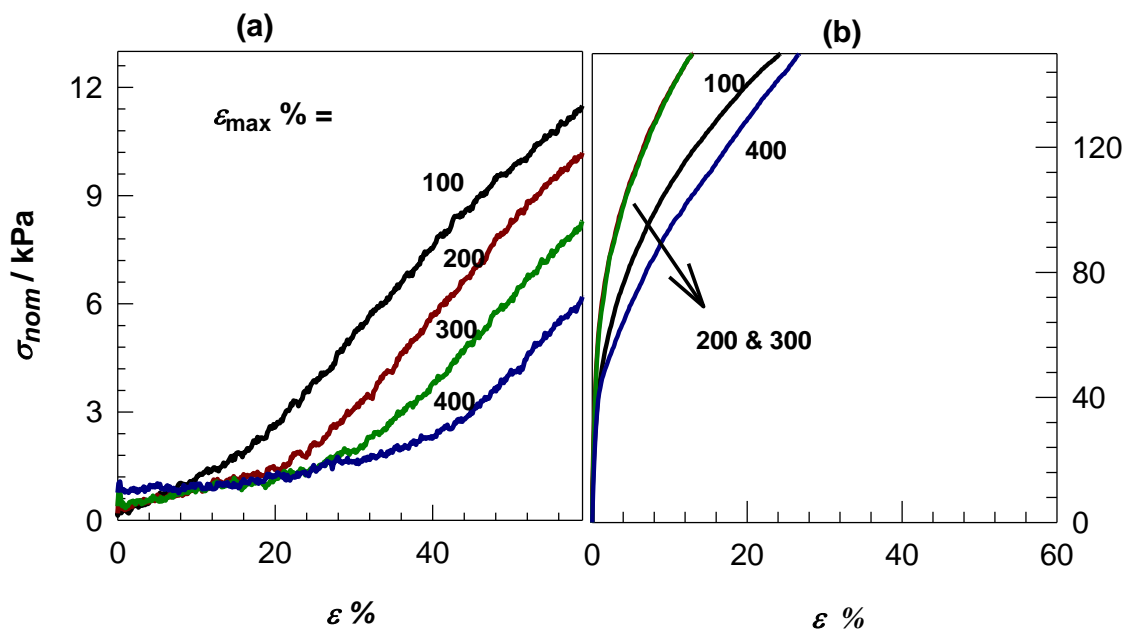

**Figure S10.** Initial portion of the loading curves of successive cyclic tests conducted on U-50 (a) and U-75/0.6 hydrogels (b).

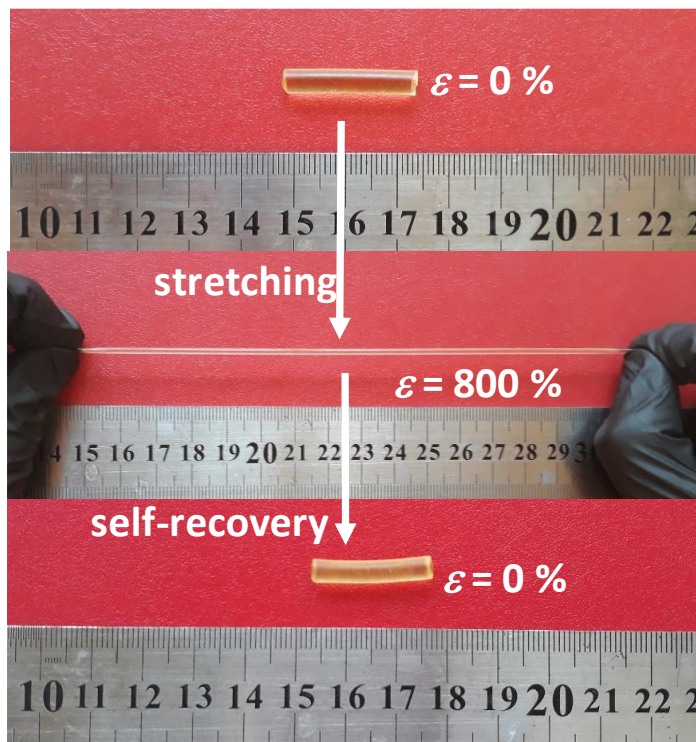

**Figure S11.** Self-recovery behavior of a rod-shaped U-75/0.6 gel specimen after stretching to 800 % elongation ratio.
